# Supplementary material for: A specific electrochemiluminescence sensor for selective and ultra-sensitive mercury(ii) detection based on dithiothreitol functionalized copper nanocluster/carbon nitride nanocomposites
Source: Royal Society of Chemistry journal article supplement (doi:10.1039/c9an00667b), 2019-01-01
Supplement: c9an00667b1.pdf [file c9an00667b1.pdf]

**A specific electrochemiluminescence sensor for selective and ultra-sensitive mercury(II) detection based on dithiothreitol functionalized copper nanoclusters/carbon nitride nanocomposite**

Huitao Liu<sup>1</sup>, Xueqing Gao<sup>1</sup>, Xuming Zhuang<sup>1,3,\*</sup>, Chunyuan Tian<sup>1</sup>, Zhenguang Wang<sup>2,\*</sup>, Yanxiu Li<sup>3</sup>, Andrey L. Rogach<sup>3,4</sup>

<sup>1</sup>College of Chemistry and Chemical Engineering, Yantai University, Yantai 264005, China

<sup>2</sup>College of Chemistry and Environmental Science, Hebei University, Baoding 071002, China

<sup>3</sup>Department of Materials Science and Engineering, and Centre for Functional Photonics (CFP), City University of Hong Kong, 83 Tat Chee Avenue, Kowloon, Hong Kong SAR

<sup>4</sup>Shenzhen Research Institute, City University of Hong Kong, Shenzhen, 518057, China

\*Corresponding author.

E-mail address: xmzhuang@iccas.ac.cn (X. Zhuang); wzg583@163.com (Z. Wang).

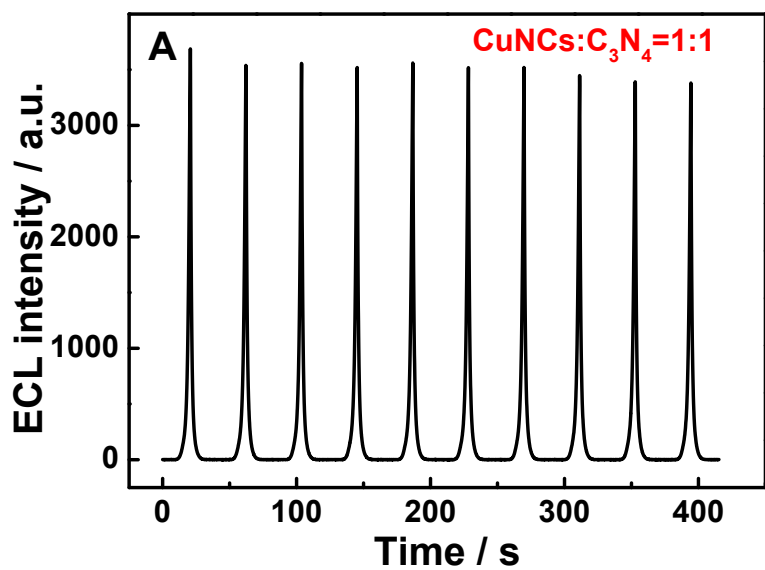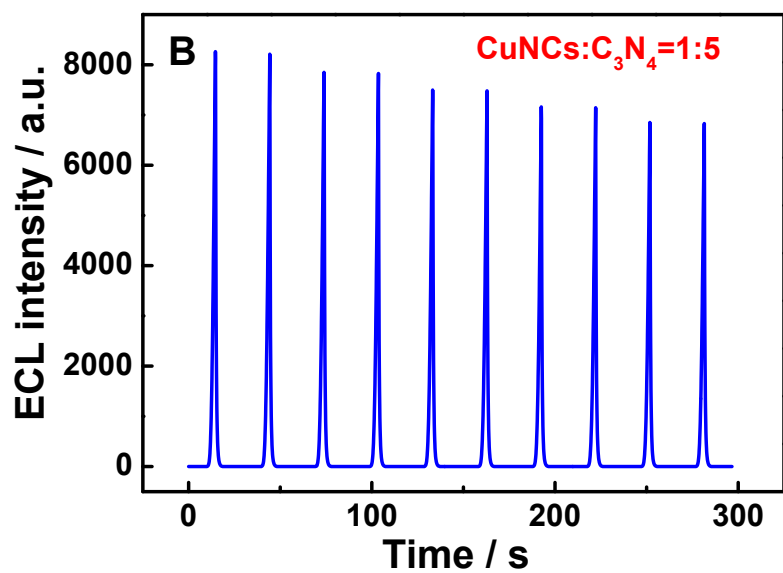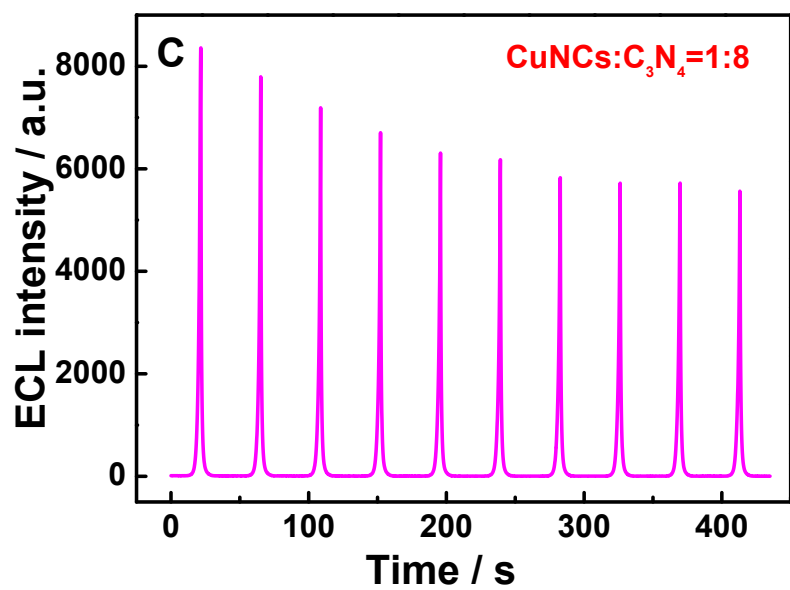

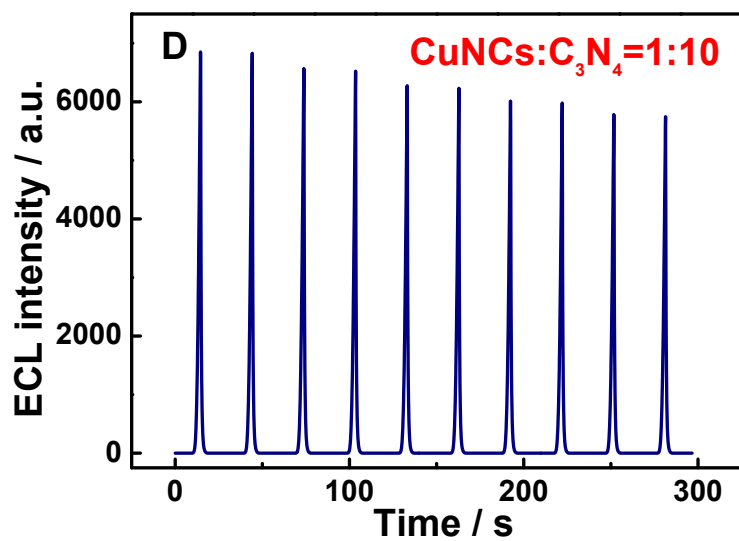

**Fig. S1.** Influence of the mass ratios of DTT-CuNCs and CNNS on the ECL intensity of resulting DTT-CuNCs/CNNS nanocomposites.

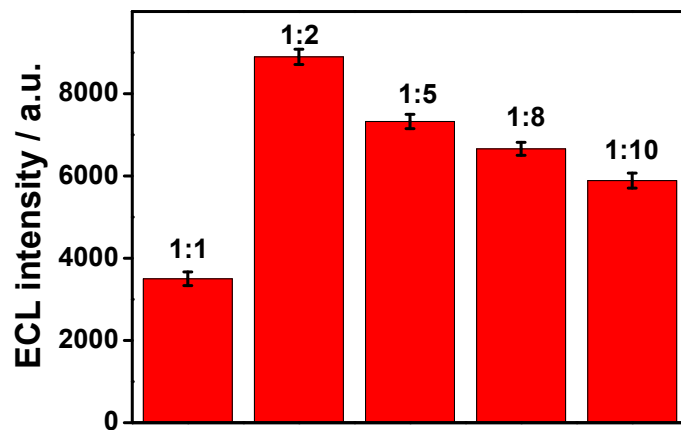

**Fig. S2.** Histogram of the ECL intensity for the different concentration ratios of DTT-CuNCs and CNNS in the DTT-CuNCs/CNNS nanocomposite, as indicated above each bar.

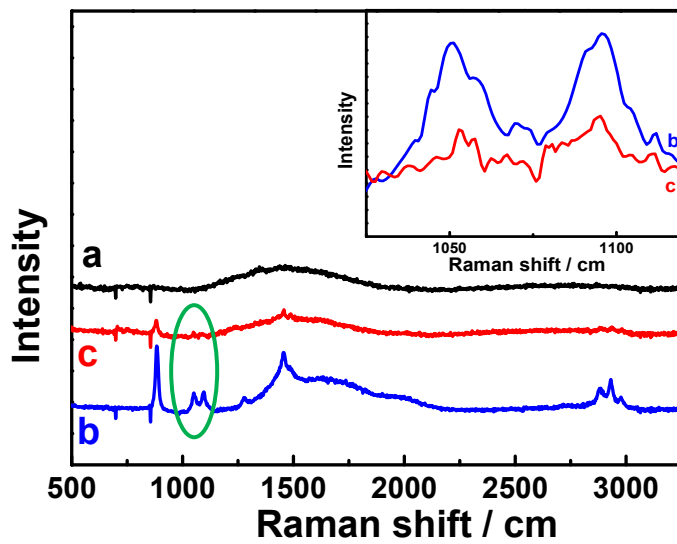

**Fig. S3.** Raman spectra of CNNS (a), DTT-CuNCs (b) and DTT-CuNCs/CNNS (c), and the green encircled area in exemplified by an inset.

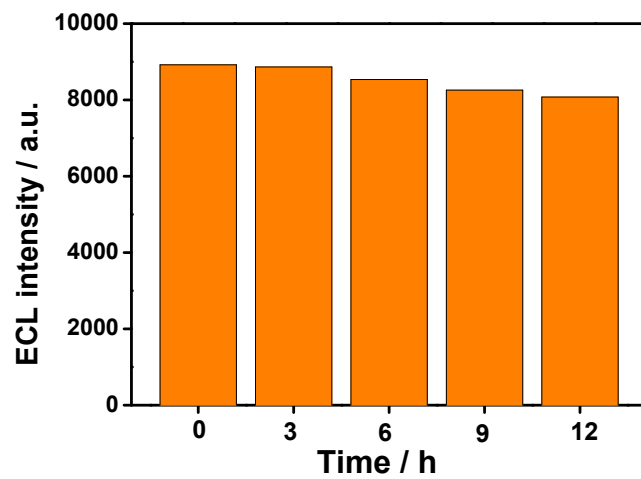

**Fig. S4.** The ECL intensity of proposed ECL sensor after immersion in the co-reactant at different times.

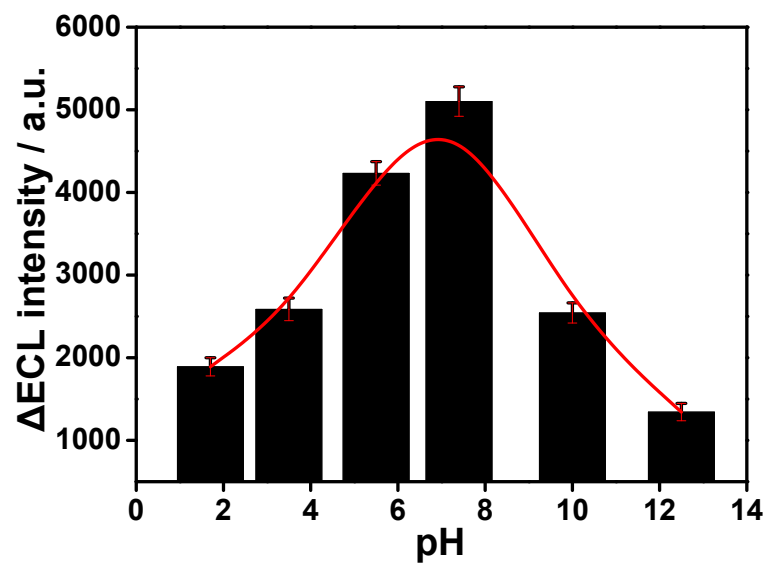

**Fig. S5.** The ECL decrement ( $\Delta I = I_0 - I$ ) for the detection of 10 nM of  $\text{Hg}^{2+}$  at different pH of co-reactant.

The pH value of co-reactant from left to right: 1.7, 3.5, 5.5, 7.4, 10, 12.5.

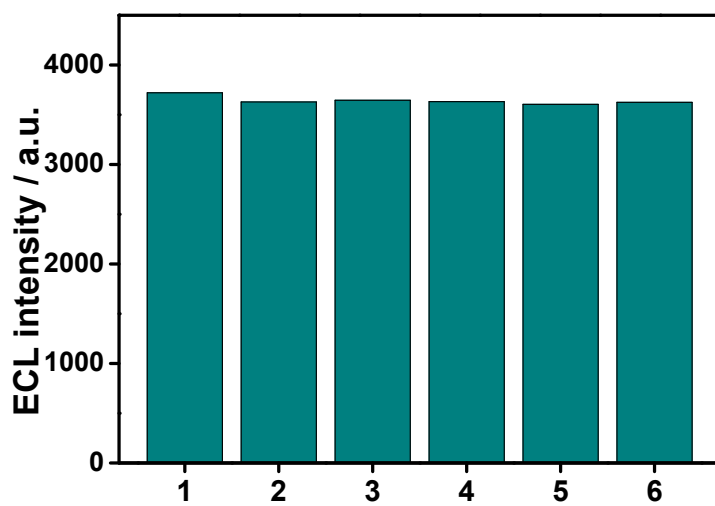

**Fig. S6.** The reproducibility of ECL sensor with six different electrodes.



**Table S1** Performance comparison for the ECL detection (using the DTT-CuNCs/CNNS sensor developed here) with several other commonly used methods for Hg<sup>2+</sup> detection.

| Method                        | LOD                       | Reference        |
|-------------------------------|---------------------------|------------------|
| AAS                           | 0.01 $\mu\text{g L}^{-1}$ | 3                |
| Fluorescence                  | 1.5 nM                    | 4                |
| AFS                           | 1.4ng L <sup>-1</sup>     | 5                |
| ICP-MS                        | 1.82 $\mu\text{g / g}$    | 6                |
| Ultraviolet spectrophotometry | 10 nM                     | 7                |
| Electrochemical               | 0.5 nM                    | 8                |
| <b>ECL</b>                    | <b>0.01 nM</b>            | <b>This work</b> |
